# Supplementary material
Source: PubMed Central journal article supplement (PMC5555744)
Supplement: NIHMS891326-supplement-Supplemental_Figures.pdf [file NIHMS891326-supplement-Supplemental_Figures.pdf]

**Fig. S1. Anti-HLA I Abs stimulate activation of mTOR signal pathway, Akt, and ERK in EC.** *A*, Quiescent human aortic endothelial cells (EC) were treated with anti-HLA I mAb W6/32 for various time points or mIgG for 10min as control. *D*, Quiescent EC were treated with different concentration of anti-HLA I mAb W6/32 for 10 min. Proteins in the precleared cell lysates were separated by SDS-PAGE followed by immunoblotting with anti-phospho-mTOR Ser2448, anti-phospho-p70S6K Thr389, Thr421/Ser424, anti-phospho-S6RP Ser235/236, anti-phospho-Akt Ser473, or anti-phospho-ERK Thr202/Tyr204 Abs. The membrane was re-probed with anti-mTOR, anti-S6K, anti-S6RP, anti-Akt or anti-ERK total Ab to confirm equal loading of proteins. *B, C, E, F, G, H, I, J, K* Phosphorylated protein bands shown in *A* and *D* were quantified by densitometry scan analysis and results are expressed as the mean  $\pm$  SEM percentage of maximal increase in phosphorylation above control values. \* $p < 0.05$ , \*\* $p < 0.01$ , and \*\*\* $p < 0.001$  were analyzed by one way ANOVA with Fisher's LSD. Data represent at least three independent experiments. HAEC used in these experiments include CAR and CAS.

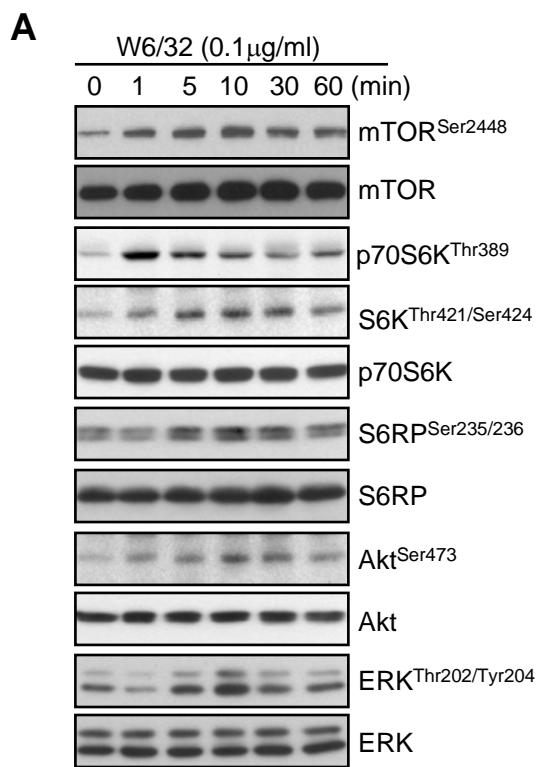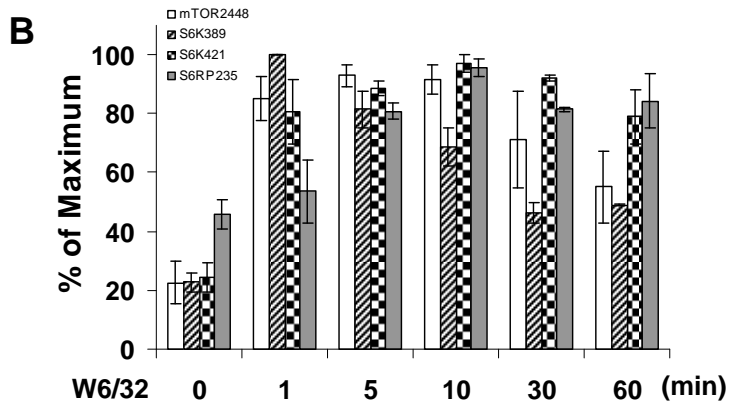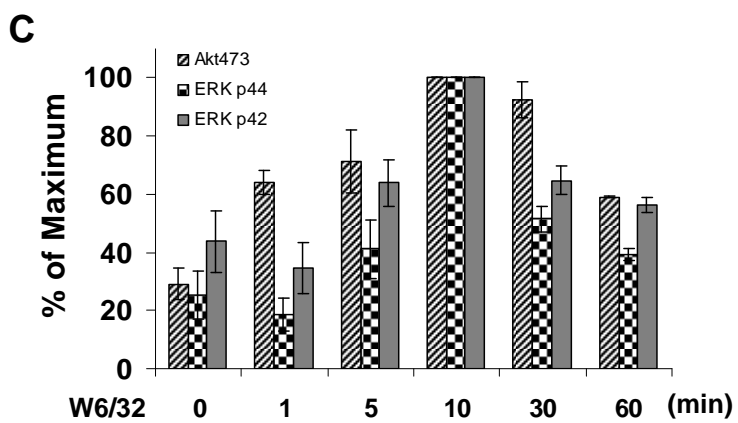

Supplemental Figure S1

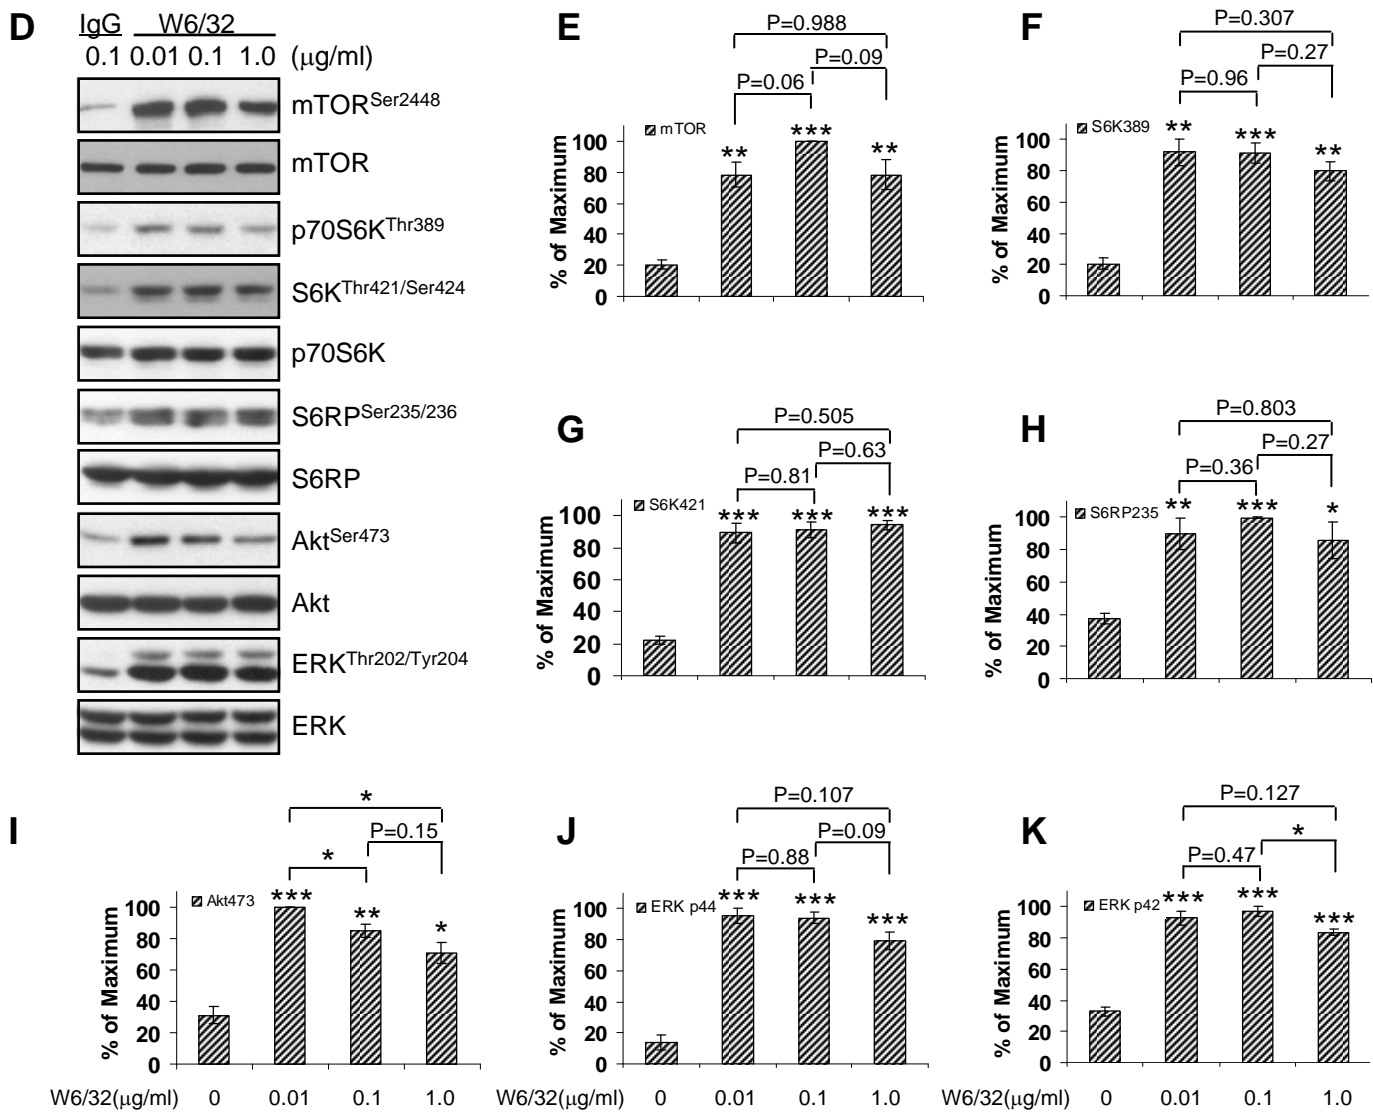

Supplemental Figure S1
